# Supplementary material for: Development of the Cyberchondria Severity Scale in Pregnancy (CSS-P)
Source: Research Square preprint supplement (doi:10.21203/rs.3.rs-8386754/v1), 2026-01-12
Supplement: Supplementary file 1 [file 60fe9b5f93dfe615815c3502.docx]

**Appendix 1. Cyberchondria Severity Scale in Pregnancy (CSS-P)**

| **Subdimensions** | **Item Numbers** | **Items** | **Strongly disagree (1)** | **Disagree (2)** | **Undecided (3)** | **I agree (4)** | **I strongly agree (5)** |
| --- | --- | --- | --- | --- | --- | --- | --- |
| **Difficulty in Controlling** | CCS_P1 | I find it difficult to limit my online research about my pregnancy. |  |  |  |  |  |
| CCS_P2 | I constantly find myself checking my pregnancy symptoms online and I can't stop myself. |  |  |  |  |  |
| CCS_P3 | Resisting the urge to research my pregnancy online is very difficult for me. |  |  |  |  |  |
| CCS_P4 | Even if I try to reduce my research on pregnancy-related information, I lose control. |  |  |  |  |  |
| CCS_P5 | I usually exceed the time limit I set for myself before starting to research pregnancy-related information online. |  |  |  |  |  |
| **Disruption in Daily Life** | CCS_P6 | Researching health information related to pregnancy on the internet interferes with my daily tasks. |  |  |  |  |  |
| CCS_P7 | I waste a lot of time researching my pregnancy concerns online. |  |  |  |  |  |
| CCS_P8 | Researching pregnancy information online sometimes reduces the time I spend with my spouse or family. |  |  |  |  |  |
| CCS_P9 | When researching pregnancy symptoms online, I neglect other important tasks. |  |  |  |  |  |
| **Compulsive Online Searching Behavior** | CCS_P10 | I can't stop researching health information about my pregnancy online. |  |  |  |  |  |
| CCS_P11 | I feel the need to check my pregnancy symptoms online several times a day. |  |  |  |  |  |
| CCS_P12 | I feel the need to check information about my baby's health online several times a day. |  |  |  |  |  |
| CCS_P13 | I feel a strong urge to research every symptom that concerns me about my pregnancy online. |  |  |  |  |  |
| **Distrust of Online Information** | CCS_P14 | I generally doubt the accuracy of online health information related to pregnancy. |  |  |  |  |  |
| CCS_P15 | The information I read online about pregnancy seems contradictory to me. |  |  |  |  |  |
| CCS_P16 | When I find different information about my pregnancy on different websites, I don't know what to believe. |  |  |  |  |  |
| CCS_P17 | The information I find online about pregnancy symptoms confuses me more than it reassures me. |  |  |  |  |  |
| **Anxiety** | CCS_P18 | After researching my pregnancy symptoms online, my anxiety usually increases. |  |  |  |  |  |
| CCS_P19 | When I read about a problem related to my pregnancy online, I feel like I have it too. |  |  |  |  |  |
| CCS_P20 | The information I read online about pregnancy complications makes me very anxious. |  |  |  |  |  |
| CCS_P21 | When I research health information related to pregnancy online, I often panic about my baby's health. |  |  |  |  |  |

The Cyberchondria Severity Scale (CSS-P) has been found to be a valid and reliable tool. This 21-item tool consists of five factors: difficulty controlling (5 items), disruption to daily life (4 items), compulsive online searching behavior (4 items), distrust of online information (4 items), and anxiety (4 items). With its good psychometric properties, the CSS-P can be used in clinical and research settings to assess the multidimensional severity of cyberchondria during pregnancy and to monitor pregnant women's digital health behaviors. Higher total scores on the scale items indicate increased severity of cyberchondria during pregnancy. The Cronbach's alpha coefficient for the scale was found to be 0.92. Each subscale has a Cronbach's alpha value. The Cronbach's alpha coefficients for the five subscales are listed below.

Control Difficulty: 0.925

Daily Life Impairment: 0.972

Compulsive Online Search Behavior: 0.973

Distrust of Online Information: 0.974

Anxiety: 0.974
