# Supplementary material for: Development of the Cyberchondria Severity Scale in Pregnancy (CSS-P)
Source: Research Square preprint supplement (doi:10.21203/rs.3.rs-8386754/v1), 2026-01-12
Supplement: Supplementary file 2 [file 9cc3243053212b46883aa091.docx]

# Supplementary 1. Mapping of Initial Item Codes to Final Item Numbers

This supplementary table presents the correspondence between the original item codes used in the initial item pool and the final item numbers of the Pregnancy Cyberchondria Severity Scale after exploratory and confirmatory factor analyses.

| **Initial Item Code** | **Final Item Number** | **Factor** |
| --- | --- | --- |
| Item 1 | CSS_P10 | Factor 3: Compulsive Online Searching Behavior |
| Item 2 | CSS_P11 | Factor 3: Compulsive Online Searching Behavior |
| Item 3 | CSS_P12 | Factor 3: Compulsive Online Searching Behavior |
| Item 4 | CSS_P13 | Factor 3: Compulsive Online Searching Behavior |
| Item 5 | Removed | |
| Item 6 | Removed | |
| Item 7 | CSS_P18 | Factor 5: Anxiety |
| Item 8 | CSS_P19 | Factor 5: Anxiety |
| Item 9 | CSS_P20 | Factor 5: Anxiety |
| Item 10 | CSS_P21 | Factor 5: Anxiety |
| Item 11 | Removed | |
| Item 12 | Removed | |
| Item 13 | CSS_P14 | Factor 4: Distrust of Online Information |
| Item 14 | CSS_P15 | Factor 4: Distrust of Online Information |
| Item 15 | CSS_P16 | Factor 4: Distrust of Online Information |
| Item 16 | CSS_P17 | Factor 4: Distrust of Online Information |
| Item 17 | Removed | |
| Item 18 | Removed | |
| Item 19 | CSS_P6 | Factor 2: Disruption in Daily Life |
| Item 20 | CSS_P7 | Factor 2: Disruption in Daily Life |
| Item 21 | CSS_P8 | Factor 2: Disruption in Daily Life |
| Item 22 | CSS_P9 | Factor 2: Disruption in Daily Life |
| Item 23 | Removed | |
| Item 24 | Removed | |
| Item 25 | CSS_P1 | Factor 1: Difficulty in Controlling |
| Item 26 | CSS_P2 | Factor 1: Difficulty in Controlling |
| Item 27 | CSS_P3 | Factor 1: Difficulty in Controlling |
| Item 28 | CSS_P4 | Factor 1: Difficulty in Controlling |
| Item 29 | Removed | |
| Item 30 | CSS_P5 | Factor 1: Difficulty in Controlling |
| Item 31 | Removed | |
